# Supplementary material for: Bisbiguanide analogs induce mitochondrial stress to inhibit lung cancer cell invasion
Source: PubMed Central journal article supplement — iScience. 2024 Mar 27;27(4):109591. doi: 10.1016/j.isci.2024.109591 (PMC11022046; doi:10.1016/j.isci.2024.109591), 2024-03-27

Data S1. Analytical (<sup>1</sup>H NMR and HPLC) spectra of the alexidine analogs, related to Figure 1 and STAR methods.

**AX-1 <sup>1</sup>H NMR spectrum**

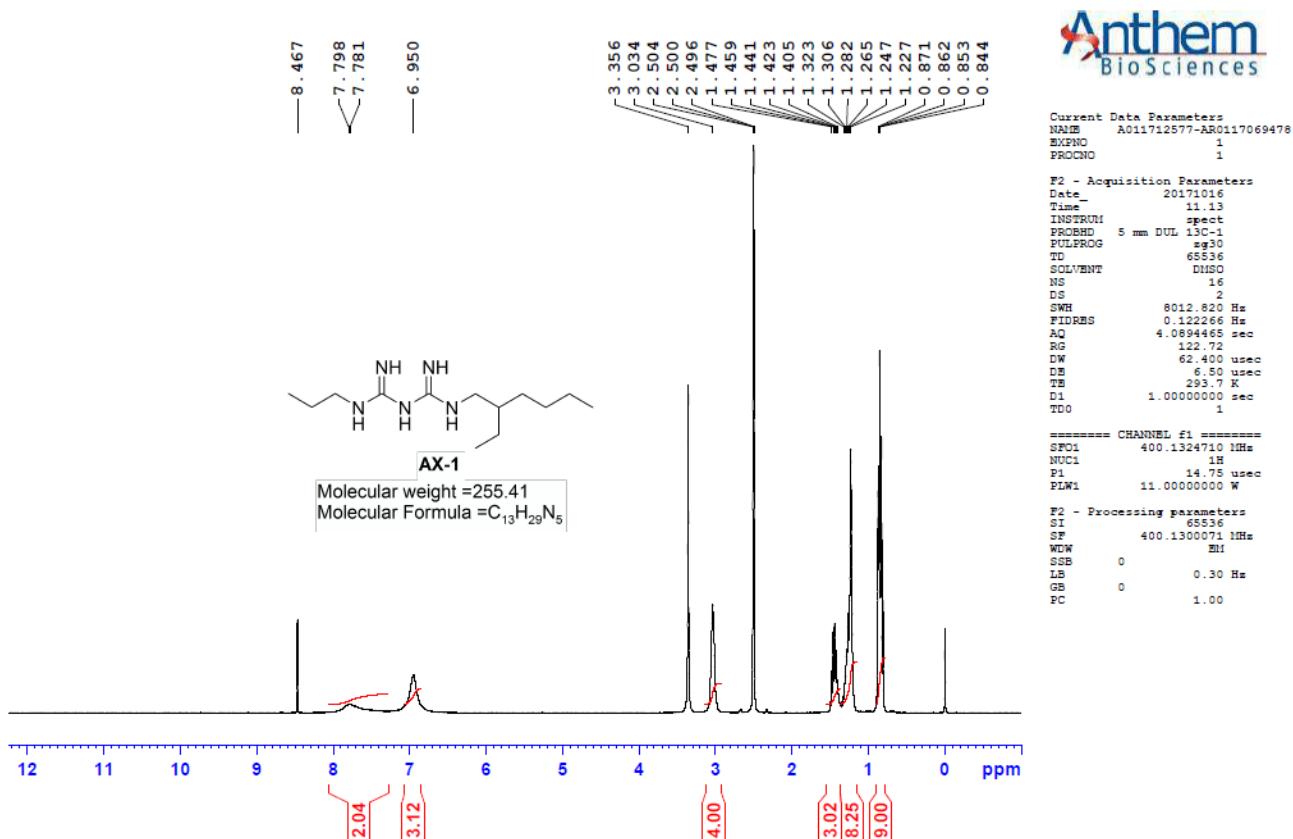

**AX-1 HPLC spectrum**

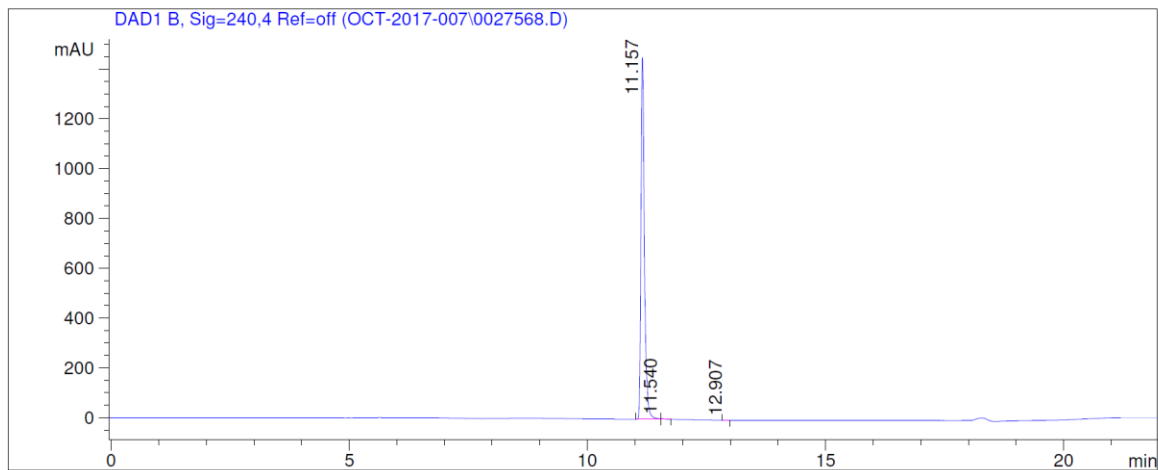

| Peak # | RT [min] | Area     | Area % | Name |
|--------|----------|----------|--------|------|
| 1      | 11.157   | 7353.478 | 99.798 |      |
| 2      | 11.540   | 13.288   | 0.180  |      |
| 3      | 12.907   | 1.560    | 0.021  |      |

### AX-2 <sup>1</sup>H NMR spectrum

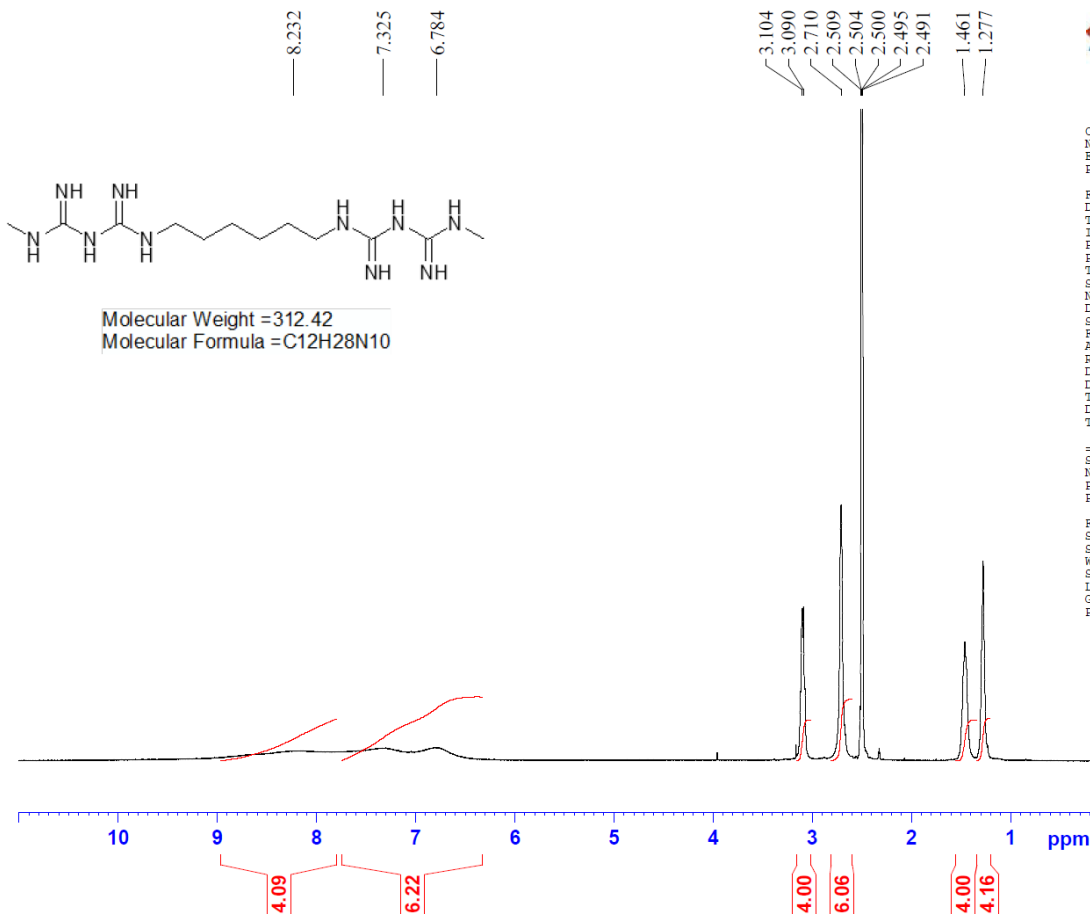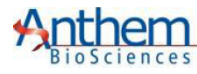

```

Current Data Parameters
NAME      A011712413-AR0118001829
EXPNO    1
PROCNO   1

F2 - Acquisition Parameters
Date_    20180110
Time     19.13
INSTRUM  spect
PROBHD   5 mm DUL 13C-1
PULPROG  zg30
TD        65536
SOLVENT  DMSO
NS        16
DS         2
SWH       8012.820 Hz
FIDRES    0.122266 Hz
AQ         4.0894465 sec
RG         195.48
DM         62.400 usec
DE         6.50 usec
TE         293.8 K
D1         1.00000000 sec
TD0        1

===== CHANNEL f1 =====
SFO1      400.1324710 MHz
NUC1       1H
P1         14.75 usec
PLW1       11.00000000 W

F2 - Processing parameters
SI         65536
SF         400.1300071 MHz
WDW        EM
SSB        0
LB         0.30 Hz
GB         0
PC         1.00
    
```

### AX-2 HPLC spectrum

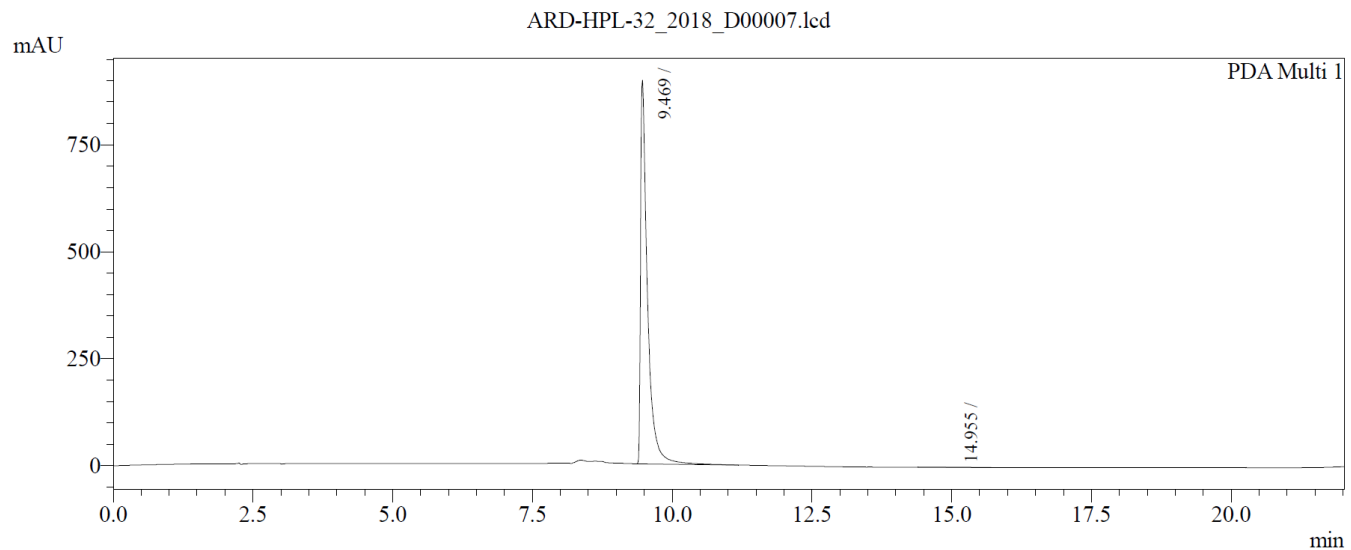

1 PDA Multi 1 / 235nm,4nm

Peak Table

| Peak# | Ret. Time (min) | RRT   | Height | Area    | Area%   | Name |
|-------|-----------------|-------|--------|---------|---------|------|
| 1     | 9.469           | 1.000 | 897906 | 7736472 | 99.853  |      |
| 2     | 14.955          | 1.579 | 294    | 11417   | 0.147   |      |
| Total |                 |       | 898201 | 7747889 | 100.000 |      |

### AX-3 <sup>1</sup>H NMR spectrum

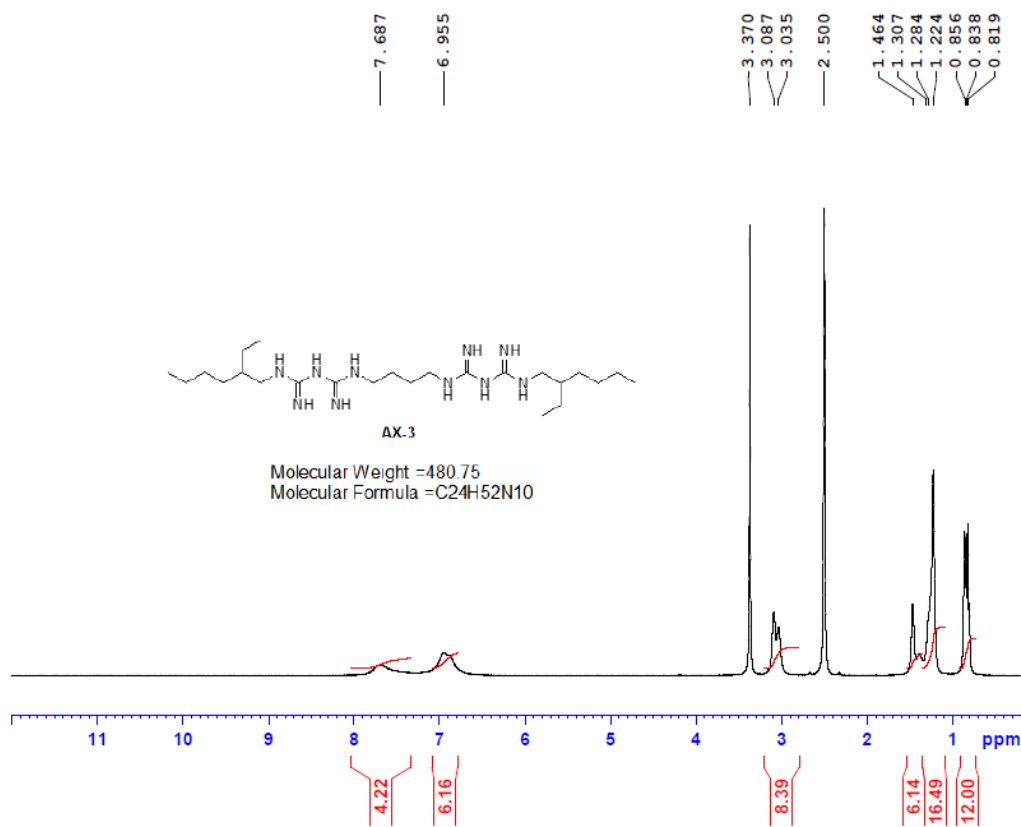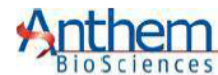

```

Current Data Parameters
NAME      A011711900-AR0117065286
EXPNO    1
PROCNO   1

F2 - Acquisition Parameters
Date_    20170927
Time     9.11
INSTRUM spect
PROBHD   5 mm DUL 13C-1
PULPROG zg30
TD       65536
SOLVENT  DMSO
NS       8
DS       2
SWH      8012.820 Hz
FIDRES   0.122266 Hz
AQ       4.0894465 sec
RG       122.72
DW       62.400 usec
DE       6.50 usec
TE       293.6 K
D1       1.0000000 sec
TDO      1

===== CHANNEL f1 =====
SFO1     400.1324710 MHz
NUC1     1H
P1       14.75 usec
PLW1     11.0000000 W

F2 - Processing parameters
SI       65536
SF       400.1300071 MHz
WDW      EM
SSB      0
LB       0.30 Hz
GB       0
PC       1.00
    
```

### AX-3 HPLC spectrum

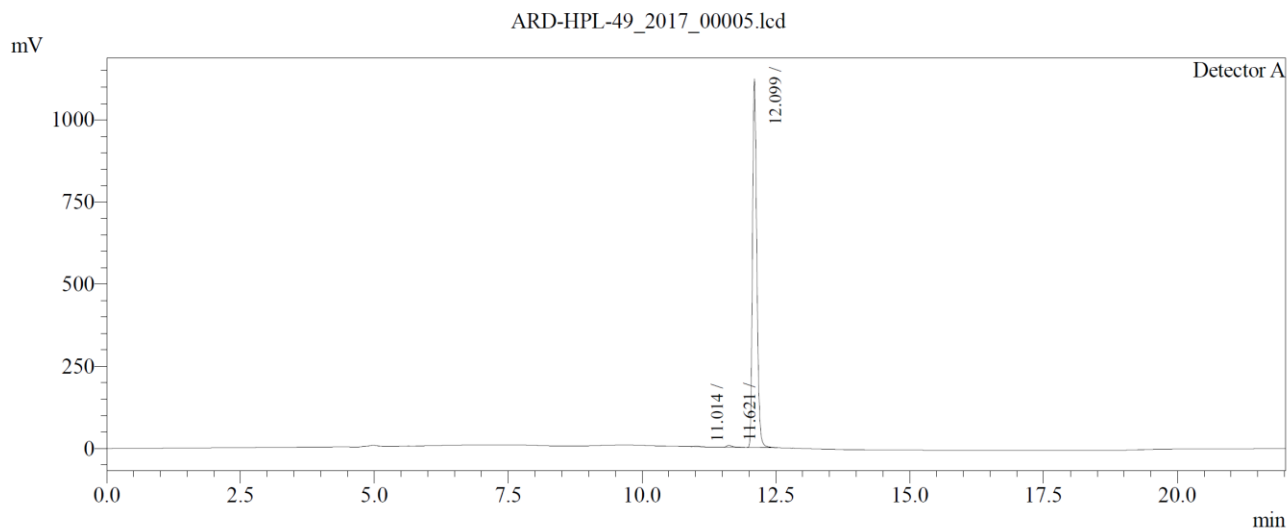

1 Detector A / 240nm

Peak Table

| Peak# | Ret. Time (min) | RRT   | Height  | Area    | Area%   | Name |
|-------|-----------------|-------|---------|---------|---------|------|
| 1     | 11.014          | 0.910 | 1941    | 11447   | 0.179   |      |
| 2     | 11.621          | 0.960 | 6052    | 42715   | 0.668   |      |
| 3     | 12.099          | 1.000 | 1121888 | 6340270 | 99.153  |      |
| Total |                 |       | 1129880 | 6394432 | 100.000 |      |

## AX-4 <sup>1</sup>H NMR spectrum

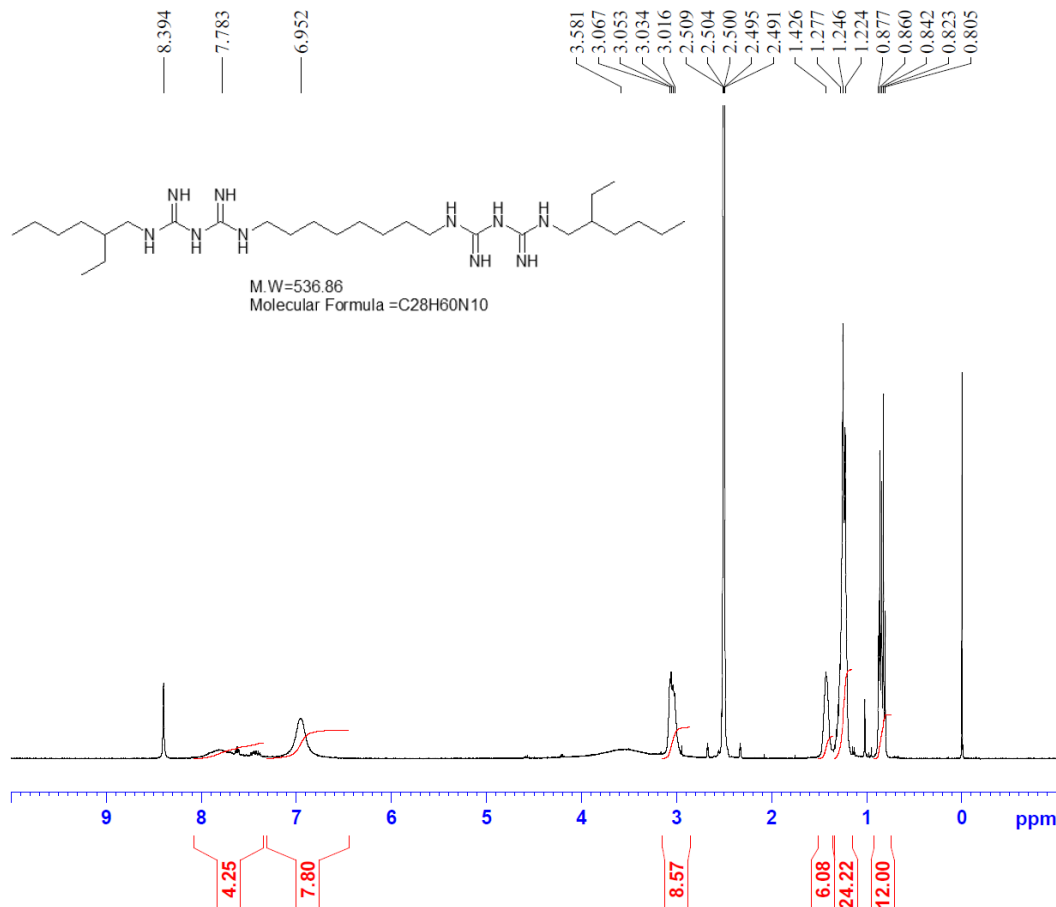

**Anthem**  
BioSciences

Current Data Parameters  
NAME A011800394-AR0118004155  
EXPNO 1  
PROCNO 1

F2 - Acquisition Parameters  
Date\_ 20180124  
Time\_ 17.25  
INSTRUM spect  
PROBHD 5 mm DUL 13C-1  
PULPROG zg30  
TD 65536  
SOLVENT DMSO  
NS 16  
DS 2  
SWH 8012.820 Hz  
FIDRES 0.122266 Hz  
AQ 4.089465 sec  
RG 195.48  
DW 62.400 usec  
DE 6.50 usec  
TE 293.3 K  
D1 1.0000000 sec  
TDO 1

==== CHANNEL f1 =====  
SF01 400.1324710 MHz  
NUC1 1H  
P1 14.75 usec  
PLW1 11.00000000 W  
F2 - Processing parameters  
SI 65536  
SF 400.1300071 MHz  
WDW EM  
SSB 0  
LB 0.30 Hz  
GB 0  
PC 1.00

## AX-4 HPLC spectrum

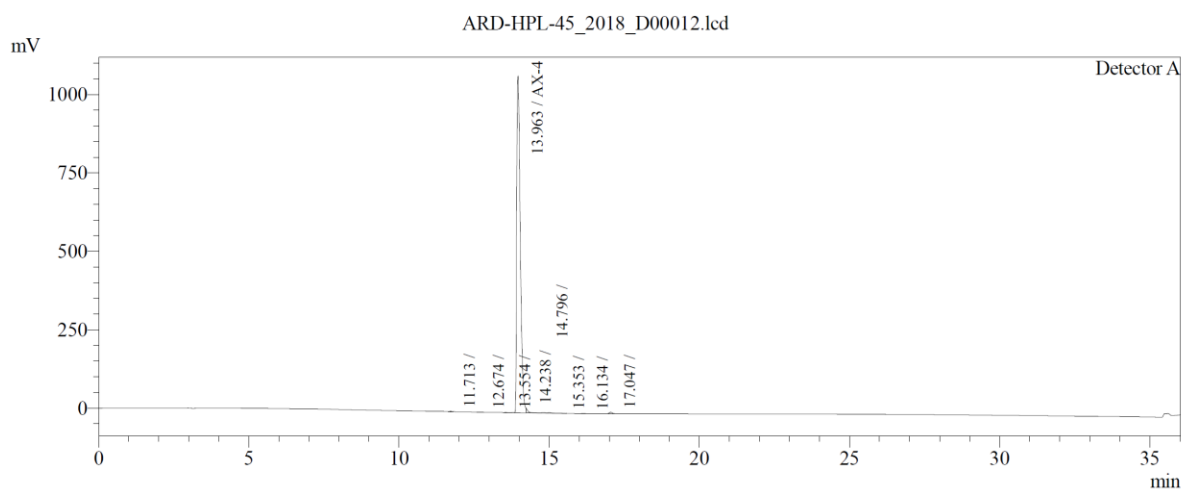

1 Detector A / 234nm

Peak Table

| Peak# | Ret. Time (min) | RRT   | Height  | Area    | Area%   | Name |
|-------|-----------------|-------|---------|---------|---------|------|
| 1     | 11.713          | 0.839 | 801     | 3823    | 0.043   |      |
| 2     | 12.674          | 0.908 | 472     | 2330    | 0.026   |      |
| 3     | 13.554          | 0.971 | 318     | 2006    | 0.022   |      |
| 4     | 13.963          | 1.000 | 1072732 | 8815498 | 98.487  | AX-4 |
| 5     | 14.238          | 1.020 | 14483   | 58499   | 0.654   |      |
| 6     | 14.796          | 1.060 | 1413    | 22596   | 0.252   |      |
| 7     | 15.353          | 1.100 | 859     | 6173    | 0.069   |      |
| 8     | 16.134          | 1.156 | 975     | 5730    | 0.064   |      |
| 9     | 17.047          | 1.221 | 4804    | 34227   | 0.382   |      |
| Total |                 |       | 1096857 | 8950883 | 100.000 |      |

# AX-5 <sup>1</sup>H NMR spectrum

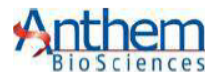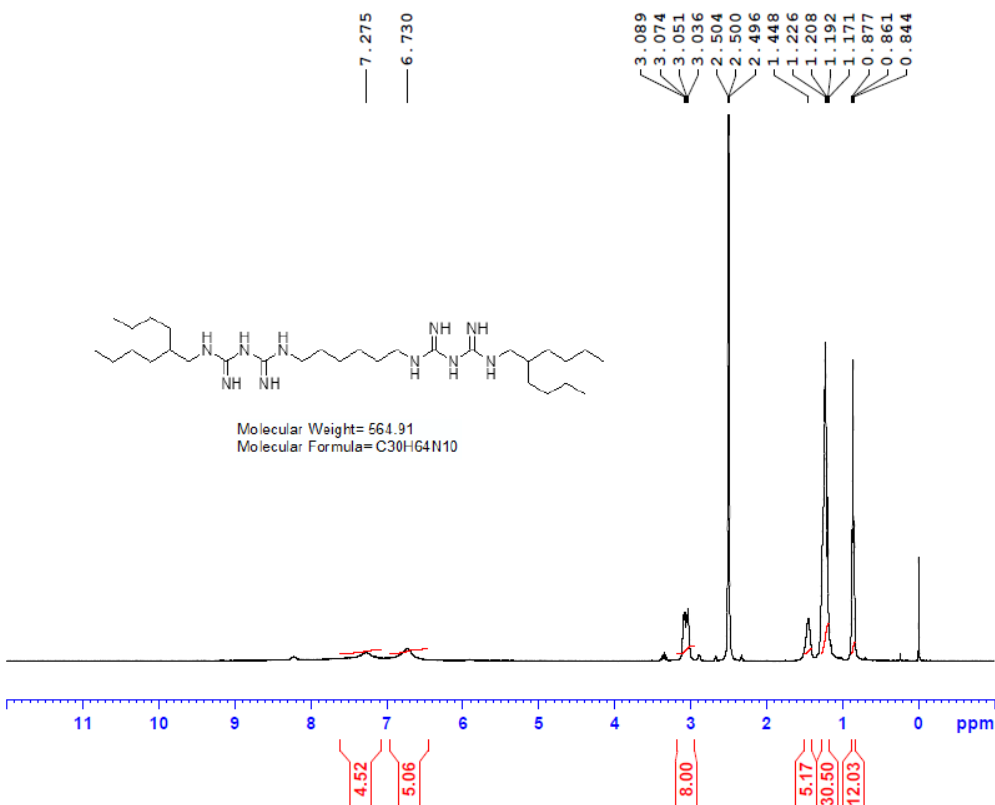

```

Current Data Parameters
NAME      A011801411-AR0118010983
EXPNO    1
PROCNO   1

F2 - Acquisition Parameters
Date_    20180301
Time     13.15
INSTRUM  spect
PROBHD   5 mm DUL 13C-1
PULPROG  zg30
TD       65536
SOLVENT  DMSO
NS       16
DS       2
SWH      8012.820 Hz
FIDRES   0.1222868 Hz
AQ       4.0894465 sec
RG       195.48
DW       62.400 usec
DE       6.50 usec
TE       293.5 K
D1       1.00000000 sec
TDO      1

===== CHANNEL f1 =====
SFO1     400.1324710 MHz
NUC1     1H
P1       14.75 usec
PL1     11.00000000 W

F2 - Processing parameters
SI       65536
SF       400.1300071 MHz
WDW      EM
SSB      0
LB       0.30 Hz
GB       0
FC       1.00
    
```

# AX-5 HPLC spectrum

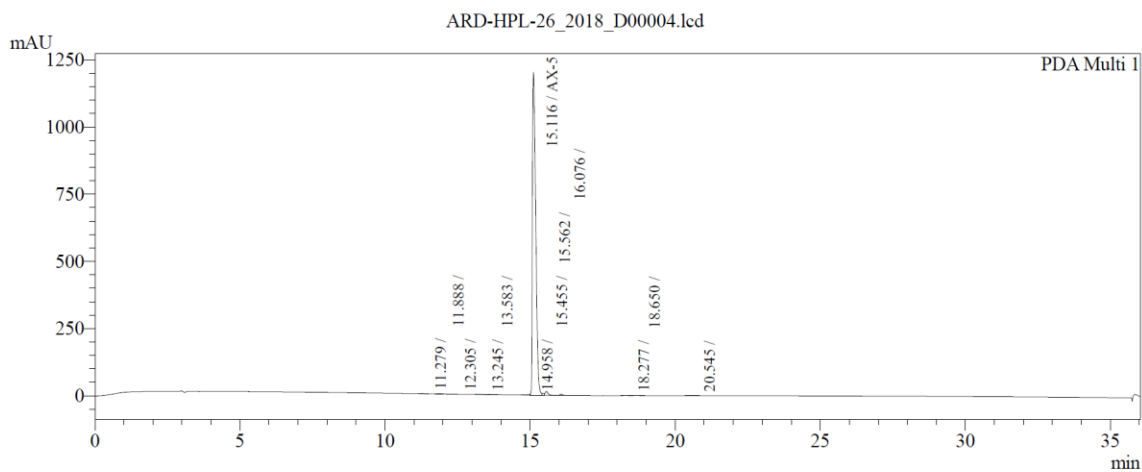

1 PDA Multi 1 / 235nm,4nm

Peak Table

| Peak# | Ret. Time (min) | RRT   | Height  | Area    | Area%   | Name |
|-------|-----------------|-------|---------|---------|---------|------|
| 1     | 11.279          | 0.746 | 1120    | 4802    | 0.049   |      |
| 2     | 11.888          | 0.786 | 1199    | 7413    | 0.076   |      |
| 3     | 12.305          | 0.814 | 524     | 2009    | 0.021   |      |
| 4     | 13.245          | 0.876 | 928     | 4464    | 0.046   |      |
| 5     | 13.583          | 0.899 | 1019    | 9289    | 0.095   |      |
| 6     | 14.958          | 0.990 | 2676    | 16497   | 0.168   |      |
| 7     | 15.116          | 1.000 | 1201337 | 9563353 | 97.638  | AX-5 |
| 8     | 15.455          | 1.022 | 7399    | 35587   | 0.363   |      |
| 9     | 15.562          | 1.030 | 14640   | 98431   | 1.005   |      |
| 10    | 16.076          | 1.063 | 4924    | 39364   | 0.402   |      |
| 11    | 18.277          | 1.209 | 444     | 5089    | 0.052   |      |
| 12    | 18.650          | 1.234 | 444     | 6624    | 0.068   |      |
| 13    | 20.545          | 1.359 | 162     | 1819    | 0.019   |      |
| Total |                 |       | 1236817 | 9794742 | 100.000 |      |

# AX-7 <sup>1</sup>H NMR spectrum

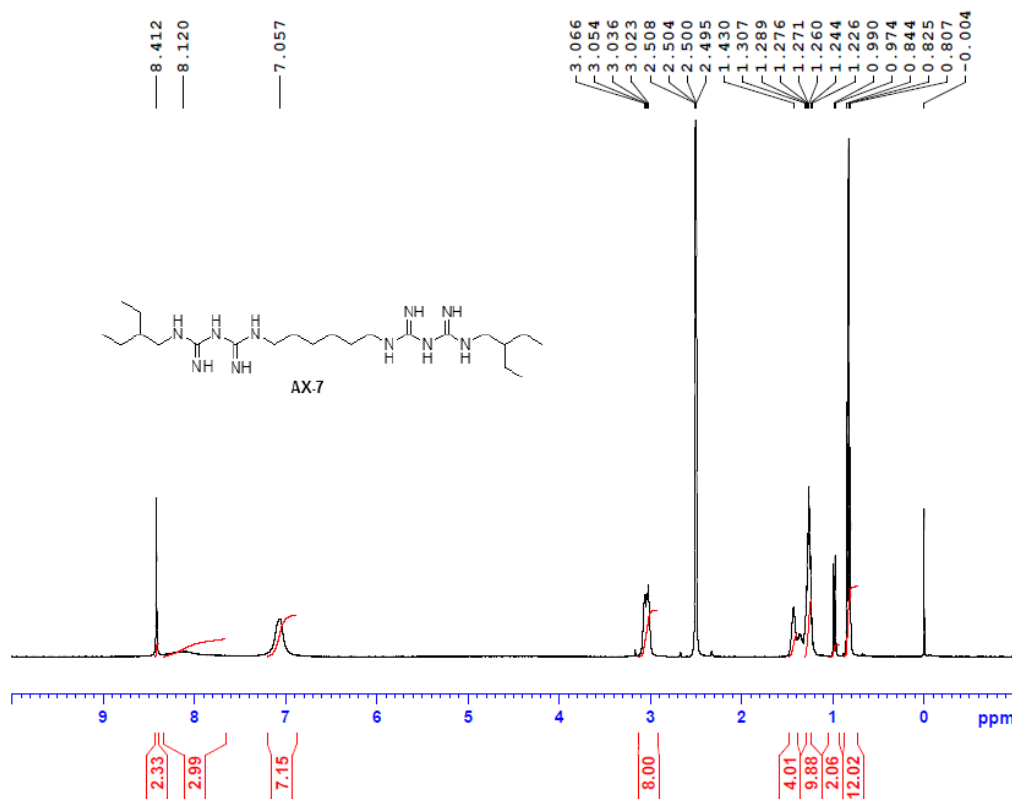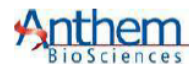

```

Current Data Parameters
NAME      A011800485-AB0118012713
EXPNO    1
PROCNO   1

F2 - Acquisition Parameters
Date_    20180309
Time     11.04
INSTRUM  spect
PROBHD   5 mm DUL 13C-1
PULPROG  zg30
ID       65536
SOLVENT  DMSO
NS       16
DS       2
SWH      8012.800 Hz
FIDRES   0.122266 Hz
AQ       4.0894465 sec
RG       195.48
DM       62.400 usec
DE       6.50 usec
TE       294.2 K
D1       1.00000000 sec
TD       1

===== CHANNEL f1 =====
SFO1    400.1324710 MHz
NUC1     1H
P1      14.75 usec
PLW1    11.00000000 W

F2 - Processing parameters
SI      65536
SF      400.1300071 MHz
WDW     EM
SSB     0
LB      0.30 Hz
GB      0
PC      1.00
    
```

# AX-7 HPLC spectrum

ARD-HPL-45\_2018\_D00017.lcd

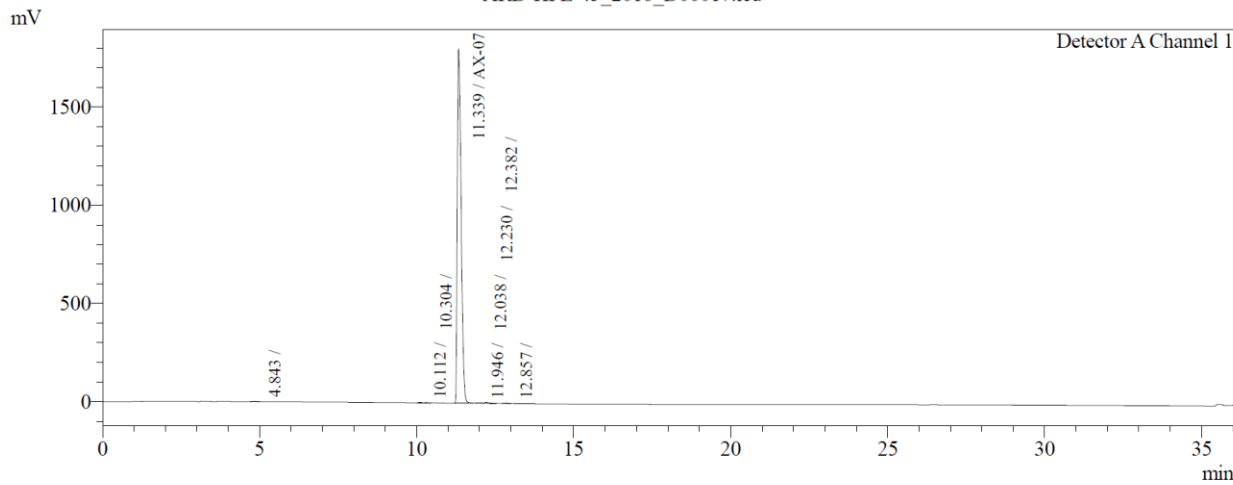

1 Detector A Channel 1 / 235nm

Peak Table

| Peak# | Ret. Time (min) | RRT   | Height  | Area     | Area%   | Name  |
|-------|-----------------|-------|---------|----------|---------|-------|
| 1     | 4.843           | 0.427 | 661     | 5048     | 0.032   |       |
| 2     | 10.112          | 0.892 | 2885    | 15470    | 0.099   |       |
| 3     | 10.304          | 0.909 | 1135    | 6206     | 0.040   |       |
| 4     | 11.339          | 1.000 | 1800147 | 15587356 | 99.397  | AX-07 |
| 5     | 11.946          | 1.054 | 1889    | 11184    | 0.071   |       |
| 6     | 12.038          | 1.062 | 928     | 3519     | 0.022   |       |
| 7     | 12.230          | 1.079 | 4869    | 28603    | 0.182   |       |
| 8     | 12.382          | 1.092 | 1170    | 6326     | 0.040   |       |
| 9     | 12.857          | 1.134 | 2731    | 18231    | 0.116   |       |
| Total |                 |       | 1816415 | 15681942 | 100.000 |       |

## AX-10 <sup>1</sup>H NMR spectrum

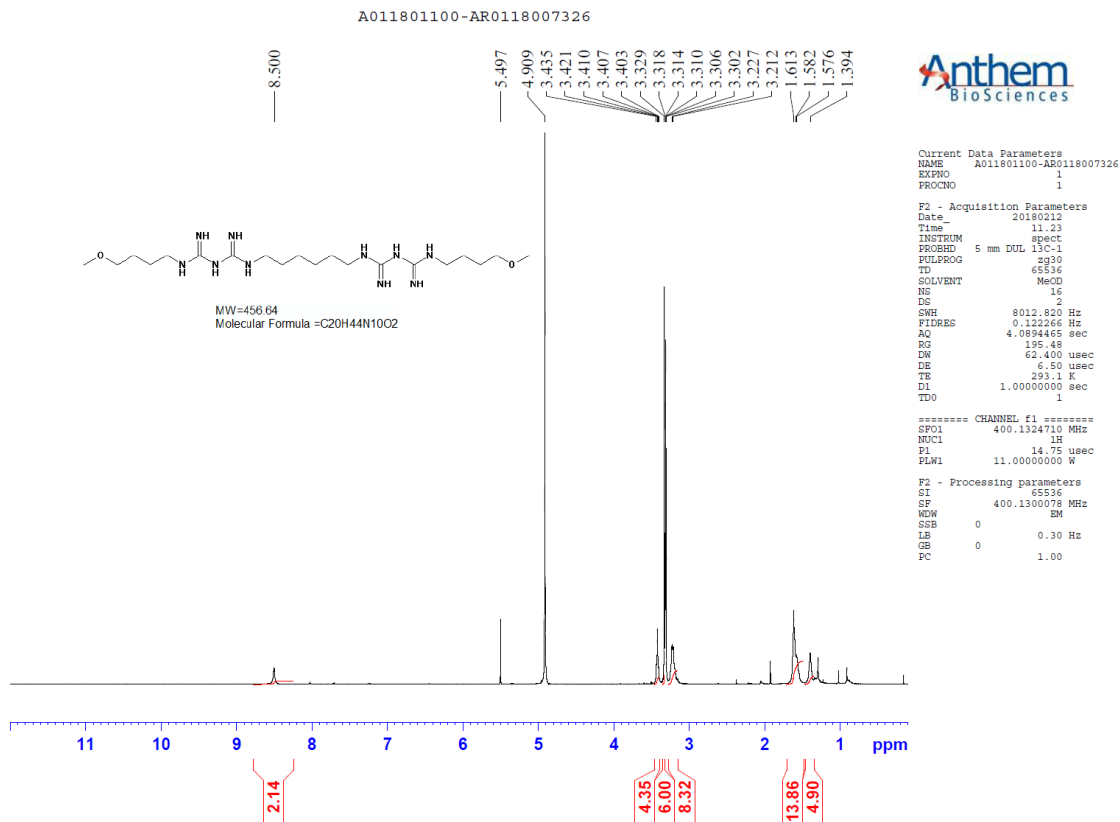

## AX-10 HPLC spectrum

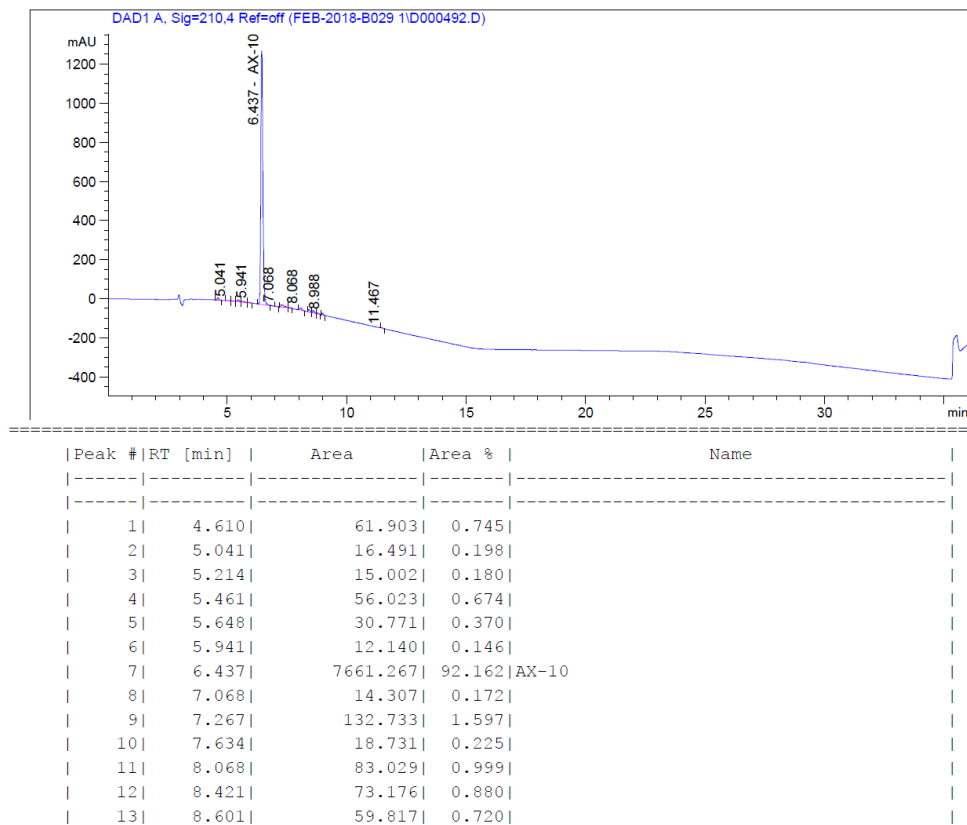

Supplement: mmc2.pdf [file mmc2.pdf]
