# Supplementary material for: Bisbiguanide analogs induce mitochondrial stress to inhibit lung cancer cell invasion
Source: PubMed Central journal article supplement — iScience. 2024 Mar 27;27(4):109591. doi: 10.1016/j.isci.2024.109591 (PMC11022046; doi:10.1016/j.isci.2024.109591), 2024-03-27
Supplement: mmc1.pdf [file mmc1.pdf]

**Supplemental information**

**Bisbiguanide analogs induce  
mitochondrial stress to inhibit  
lung cancer cell invasion**

**Christina M. Knippler, Jamie L. Arnst, Isaac E. Robinson, Veronika Matsuk, Tala O. Khatib, R. Donald Harvey, Mala Shanmugam, Janna K. Mouw, Haiyan Fu, Thota Ganesh, and Adam I. Marcus**

## Supplemental Information

**A**

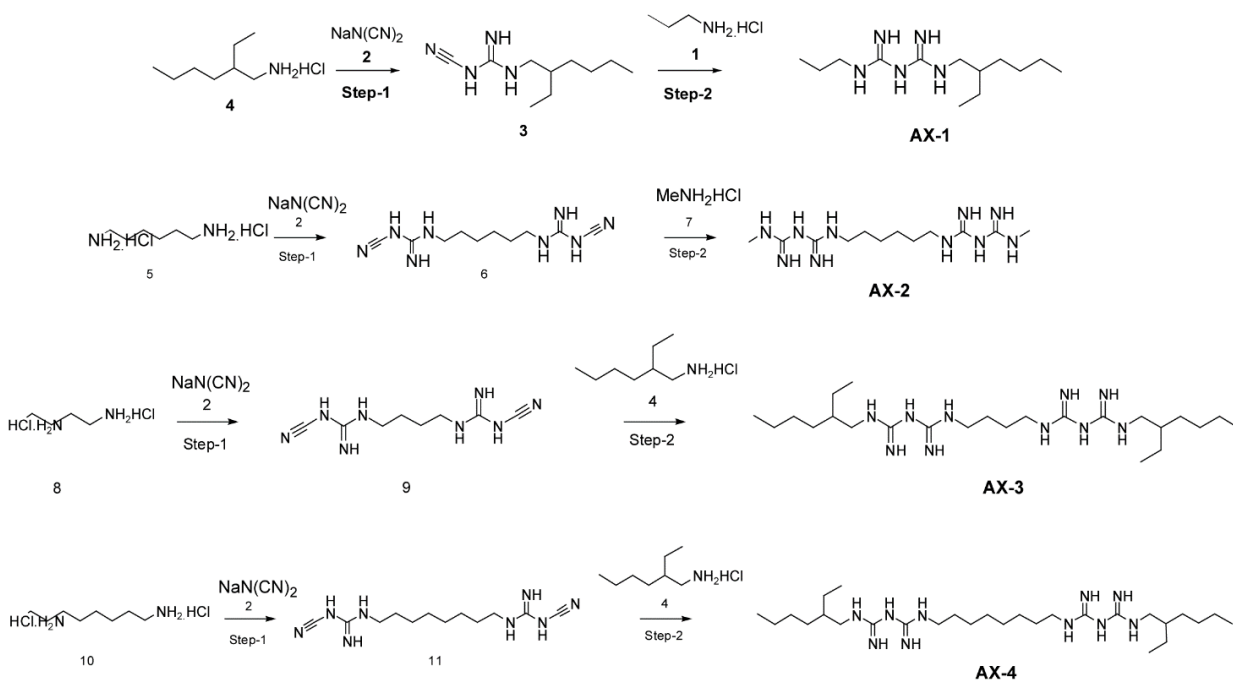

**B**

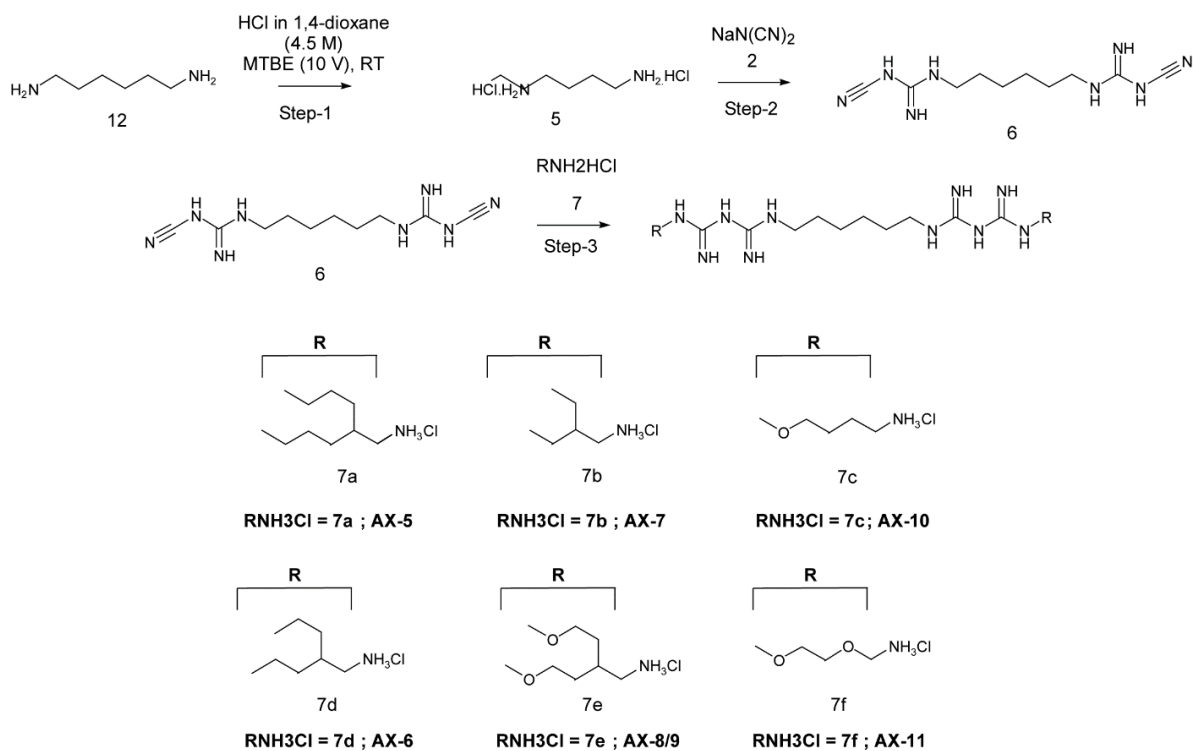

**Figure S1. Reaction schemes for the alexidine analogs related to Figure 1 and STAR methods.** (A) Reaction schemes for AX-1, AX-2, AX-3, and AX-4. (B) Reaction schemes for AX-5, AX-7, and AX-10. Intermediate reactions were the same for AX-5, AX-7, and AX-10. The R structure for compound **7** in the final step (Step-3) is shown for each analog below (i.e. **7a**, **7b**, and **7c**). AX-6, AX-8/9, and AX-11 were unable to be synthesized, but structure design is shown (i.e. **7d**, **7e**, and **7f**).

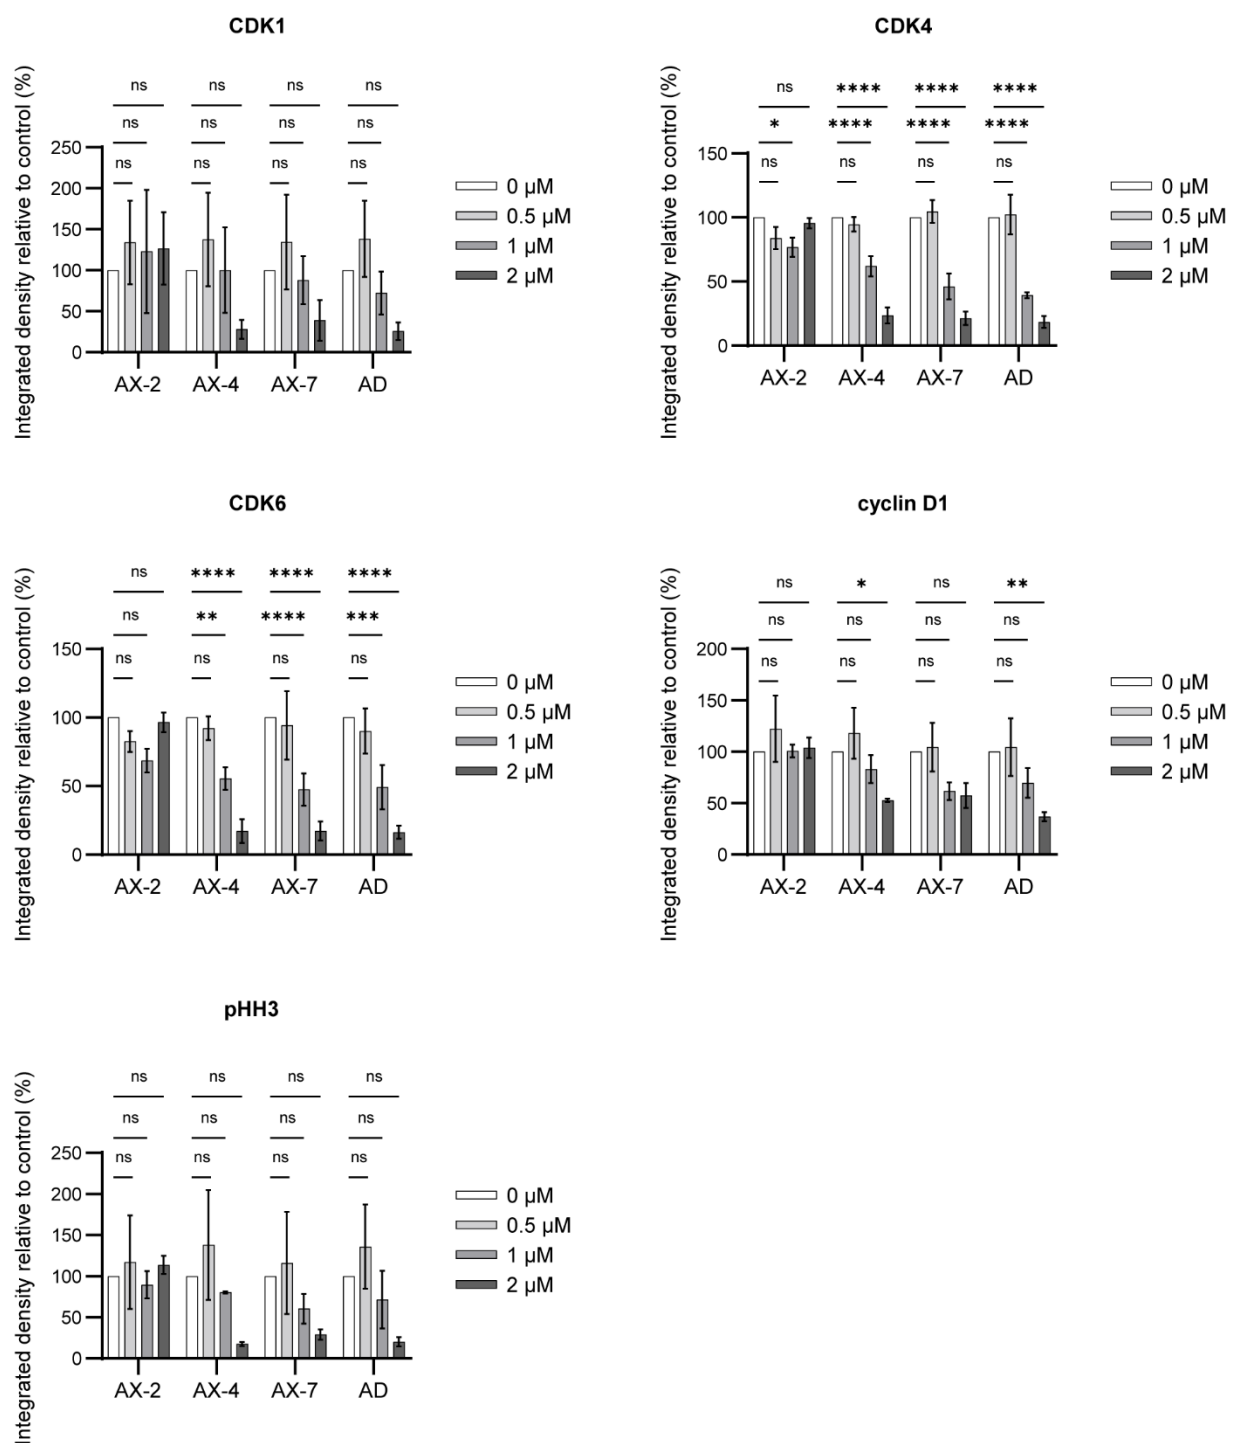

**Figure S2. Quantification of cell cycle-related proteins as detected by western blot, related to Figure 1 for representative western blots.** Data are normalized to actin and relative to the DMSO control. Mean  $\pm$  SD is shown of three biological replicates. Significance was assessed using an ordinary two-way ANOVA with a Tukey's multiple comparisons test, \* $p \leq 0.05$ , \*\* $p \leq 0.01$ , \*\*\* $p \leq 0.001$ , \*\*\*\* $p \leq 0.0001$

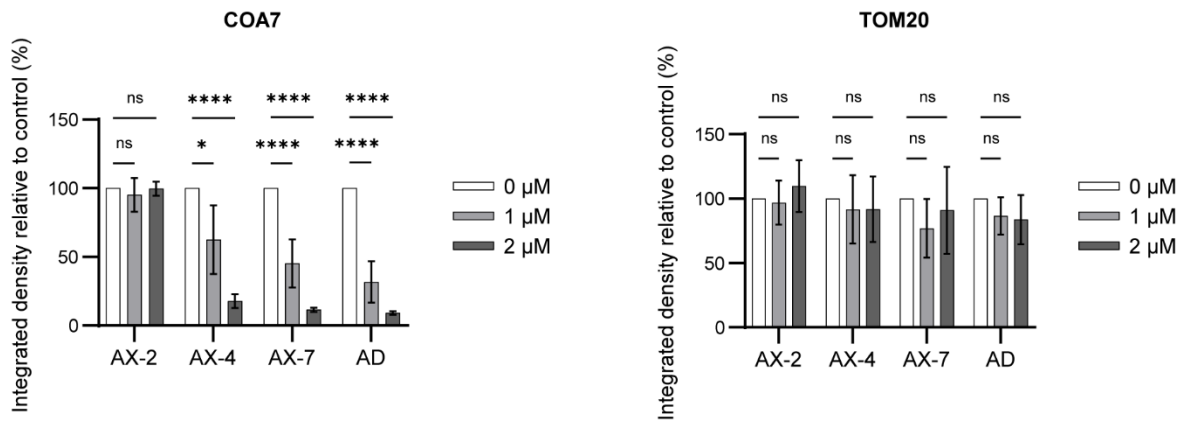

**Figure S3. Quantification of mitochondria-related proteins as detected by western blot, related to Figure 3 for representative western blots.** Data are normalized to actin and relative to the DMSO control. Mean  $\pm$  SD is shown of three biological replicates. Significance was assessed using an ordinary two-way ANOVA with a Tukey's multiple comparisons test, \* $p \leq 0.05$ , \*\* $p \leq 0.01$ , \*\*\* $p \leq 0.001$ , \*\*\*\* $p \leq 0.0001$

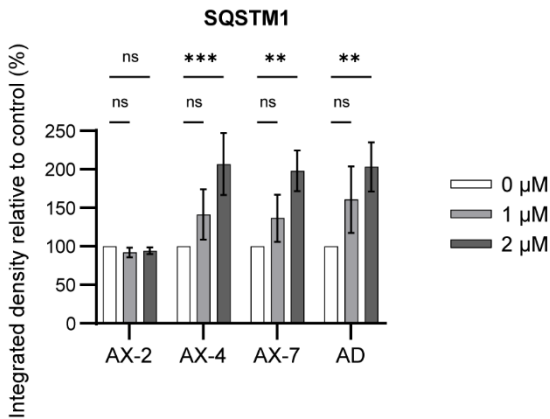

**Figure S4. Quantification of SQSTM1 as detected by western blot, related to Figure 4 for representative western blots.** Data are normalized to actin and relative to the DMSO control. Mean  $\pm$  SD is shown of three biological replicates. Significance was assessed using an ordinary two-way ANOVA with a Tukey's multiple comparisons test, \* $p \leq 0.05$ , \*\* $p \leq 0.01$ , \*\*\* $p \leq 0.001$ , \*\*\*\* $p \leq 0.0001$

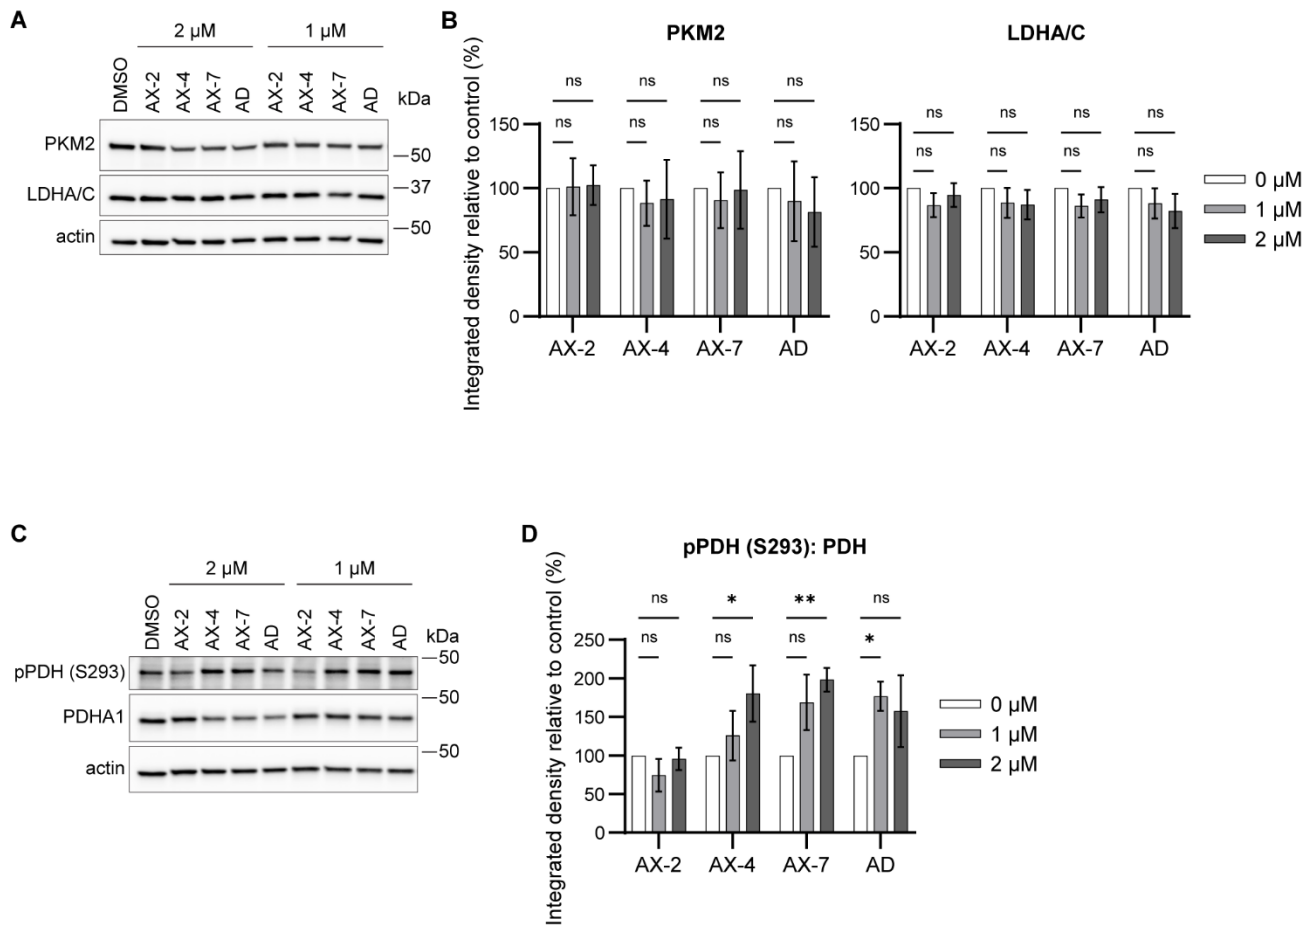

**Figure S5. Alexidine analogs shift metabolism towards glycolysis, related to Figure 4.** H1299 cells were treated for 48 hr with the analogs as indicated. Lysates were separated by western blot and probed for (A) pyruvate kinase M2 (PKM2), lactate dehydrogenase A/C (LDHA/C) and (C) pyruvate dehydrogenase (PDHA1) and phosphorylated PDH at serine 293 (pPDH (S293)). (B) Quantification of PKM2 and LDHA/C western blots are normalized to actin and relative to the DMSO control. (C) Quantification of the ratio of pPDH (S293) and total PDHA1 relative to DMSO control. Mean  $\pm$  SD is shown of three biological replicates. Significance was assessed using an ordinary two-way ANOVA with a Tukey's multiple comparisons test, \* $p \leq 0.05$ , \*\* $p \leq 0.01$ , \*\*\* $p \leq 0.001$ , \*\*\*\* $p \leq 0.0001$

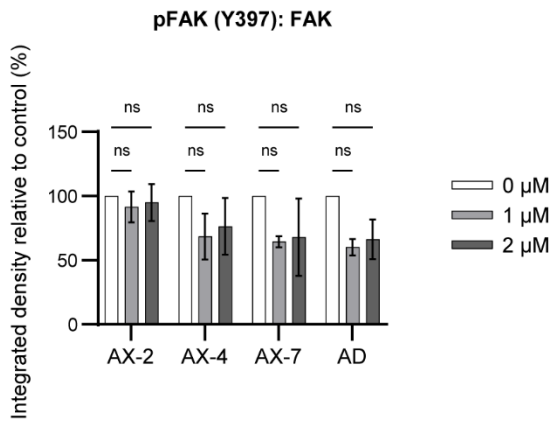

**Figure S6. Quantification of the ratio of phosphorylated FAK (pFAK (Y397)) and total FAK as detected by western blot, related to Figure 5 for representative western blots.** Data are normalized relative to the DMSO control. Mean  $\pm$  SD is shown of three biological replicates. Significance was assessed using an ordinary two-way ANOVA with a Tukey's multiple comparisons test, \* $p \leq 0.05$ , \*\* $p \leq 0.01$ , \*\*\* $p \leq 0.001$ , \*\*\*\* $p \leq 0.0001$

| Table S1. Permeability of Analogs in Caco-2 Cells |                                    |                                    |              |                    |                    |
|---------------------------------------------------|------------------------------------|------------------------------------|--------------|--------------------|--------------------|
| Compound                                          | $P_{app(A-B)}$ ( $10^{-6}$ , cm/s) | $P_{app(B-A)}$ ( $10^{-6}$ , cm/s) | Efflux Ratio | Recovery (%) AP-BL | Recovery (%) BL-AP |
| Propranolol                                       | 18.45                              | 13.20                              | 0.72         | 66.75              | 75.16              |
| Digoxin                                           | 0.27                               | 13.68                              | 50.72        | 87.02              | 83.49              |
| Alexidine                                         | <0.07                              | 0.37                               | >5.37        | <24.36             | 28.15              |
| AX-1                                              | <0.03                              | 6.74                               | >236.12      | <57.15             | 66.57              |
| AX-2                                              | 0.62                               | 0.37                               | 0.60         | 66.25              | 87.87              |
| AX-4                                              | <0.04                              | 0.30                               | >6.88        | <22.28             | 24.32              |
| AX-7                                              | 0.27                               | 0.53                               | 1.95         | 81.30              | 75.30              |

**Table S1. Permeability of Analogs in Caco-2 Cells, related to Figure 2.**  $P_{app}$  = apparent permeability; A, AP= apical; B, BL= basolateral

| Table S2. Assessment of Caco-2 Monolayer Integrity |                                                     |                                                     |                               |                               |
|----------------------------------------------------|-----------------------------------------------------|-----------------------------------------------------|-------------------------------|-------------------------------|
| Compound                                           | TEER <sub>A-B</sub> ( $\Omega \times \text{cm}^2$ ) | TEER <sub>B-A</sub> ( $\Omega \times \text{cm}^2$ ) | LY Leakage <sub>A-B</sub> (%) | LY Leakage <sub>B-A</sub> (%) |
| Propranolol                                        | 318                                                 | 342                                                 | 0.23                          | 0.21                          |
| Digoxin                                            | 504                                                 | 453                                                 | 0.18                          | 0.15                          |
| Alexidine                                          | 477                                                 | 496                                                 | 0.16                          | 0.15                          |
| AX-1                                               | 490                                                 | 507                                                 | 0.14                          | 0.15                          |
| AX-2                                               | 504                                                 | 507                                                 | 0.15                          | 0.13                          |
| AX-4                                               | 508                                                 | 490                                                 | 0.16                          | 0.15                          |
| AX-7                                               | 444                                                 | 494                                                 | 0.18                          | 0.11                          |

**Table S2. Assessment of Caco-2 Monolayer Integrity, related to Figure 2.** TEER= transepithelial electrical resistance; A= apical; B= basolateral; LY= Lucifer Yellow

| Compound      | Species | <i>In vitro</i> T <sub>1/2</sub> (min) | <i>In vitro</i> Cl <sub>int</sub> (μL/min/mg protein) | Scale-up Cl <sub>int</sub> (mL/min/kg) |
|---------------|---------|----------------------------------------|-------------------------------------------------------|----------------------------------------|
| Verapamil     | Human   | 18.17                                  | 76.29                                                 | 95.69                                  |
|               | Monkey  | 3.22                                   | 430.31                                                | 645.46                                 |
|               | Dog     | 19.35                                  | 71.62                                                 | 178.52                                 |
|               | Rat     | 7.38                                   | 187.76                                                | 336.47                                 |
|               | Mouse   | 10.32                                  | 134.25                                                | 590.70                                 |
| 7-OH coumarin | Human   | 1.85                                   | 748.86                                                | 939.19                                 |
|               | Monkey  | 2.45                                   | 564.73                                                | 847.09                                 |
|               | Dog     | 2.01                                   | 691.09                                                | 1722.76                                |
|               | Rat     | 2.42                                   | 573.25                                                | 1027.26                                |
|               | Mouse   | 2.00                                   | 692.10                                                | 3045.24                                |
| AX-7          | Human   | 668.14                                 | 2.07                                                  | 2.60                                   |
|               | Monkey  | 84.51                                  | 16.40                                                 | 24.60                                  |
|               | Dog     | 1888.13                                | 0.73                                                  | 1.83                                   |
|               | Rat     | 36.61                                  | 37.86                                                 | 67.85                                  |
|               | Mouse   | 64.63                                  | 21.44                                                 | 94.35                                  |

**Table S3. Metabolic Stability of AX-7 in Different Species of Liver Microsomes, related to Figure 2.** T<sub>1/2</sub>= half-life; Cl<sub>int</sub>= intrinsic clearance. Scale-up uses scaling factors based on the species' liver weight, microsomal concentration, and liver blood flow to estimate *in vivo* clearance.

| Compound  | Species | <i>In vitro</i> T <sub>1/2</sub> (min) | <i>In vitro</i> Cl <sub>int</sub> (μL/min/10 <sup>6</sup> cells) | Scale-up Cl <sub>int</sub> (mL/min/kg) |
|-----------|---------|----------------------------------------|------------------------------------------------------------------|----------------------------------------|
| Verapamil | Human   | 26.14                                  | 53.02                                                            | 134.89                                 |
|           | Monkey  | 10.00                                  | 138.64                                                           | 499.09                                 |
|           | Dog     | 32.24                                  | 42.99                                                            | 295.79                                 |
|           | Rat     | 20.00                                  | 69.30                                                            | 324.32                                 |
|           | Mouse   | 16.43                                  | 84.36                                                            | 996.52                                 |
| AX-7      | Human   | ∞                                      | 0.00                                                             | 0.00                                   |
|           | Monkey  | 168.57                                 | 8.22                                                             | 29.60                                  |
|           | Dog     | 151.80                                 | 9.13                                                             | 62.82                                  |
|           | Rat     | 129.01                                 | 10.74                                                            | 50.28                                  |
|           | Mouse   | 129.48                                 | 10.70                                                            | 126.45                                 |

**Table S4. Metabolic Stability of AX-7 in Different Species of Hepatocytes, related to Figure 2.** T<sub>1/2</sub>= half-life; Cl<sub>int</sub>= intrinsic clearance. If Cl<sub>int</sub> < 0, then T<sub>1/2</sub> and Cl<sub>int</sub> were reported as "∞" and "0.00", respectively. Scale-up uses scaling factors based on the species' liver weight and hepatocyte concentration to estimate *in vivo* clearance.

| Animal ID | Total AX-7 in Urine (ng) | Total AX-7 Administered (ng) | Excretory Rate (%) | Mean Excretory Rate (%) |
|-----------|--------------------------|------------------------------|--------------------|-------------------------|
| A         | 5.94                     | 51200                        | 0.0116             | 0.017                   |
| B         | 11.4                     | 50200                        | 0.0228             |                         |
| C         | 8.88                     | 53200                        | 0.0167             |                         |

**Table S5. Excretory Rate in Urine of AX-7, related to Figure 2.** Urine was collected within 4 hours of the last dose administered. AX-7 amount in the urine was detected by mass spectrometry and the excretory rate for each animal was calculated by dividing the amount of AX-7 in the urine by the amount administered via intraperitoneal injection.



| Table S6: Proteins upregulated in Control vs. Alexidine: GO Biological Process |                 |                            |
|--------------------------------------------------------------------------------|-----------------|----------------------------|
| Process Name                                                                   | Fold Enrichment | False Discovery Rate (FDR) |
| positive regulation of chromosome condensation (GO:1905821)                    | 35.75           | 3.36E-02                   |
| positive regulation of mitotic metaphase/anaphase transition (GO:0045842)      | 31.78           | 6.10E-04                   |
| anaphase-promoting complex-dependent catabolic process (GO:0031145)            | 16.58           | 3.31E-02                   |
| cholesterol biosynthetic process (GO:0006695)                                  | 15.46           | 1.67E-03                   |
| regulation of ubiquitin protein ligase activity (GO:1904666)                   | 14.67           | 4.52E-02                   |
| mitotic spindle assembly (GO:0090307)                                          | 9.73            | 4.40E-02                   |
| mitotic metaphase plate congression (GO:0007080)                               | 9.35            | 4.99E-02                   |
| regulation of muscle cell apoptotic process (GO:0010660)                       | 8.67            | 2.35E-02                   |
| mitochondrial translation (GO:0032543)                                         | 6.12            | 4.00E-02                   |
| regulation of cold-induced thermogenesis (GO:0120161)                          | 5.08            | 4.49E-02                   |
| cell division (GO:0051301)                                                     | 4.57            | 9.85E-07                   |
| cellular component disassembly (GO:0022411)                                    | 3.52            | 4.15E-02                   |
| peptidyl-amino acid modification (GO:0018193)                                  | 2.73            | 1.07E-02                   |
| protein-containing complex assembly (GO:0065003)                               | 2.13            | 3.44E-02                   |

**Table S6. Proteomics analyses of proteins upregulated in Control vs. Alexidine treated cells, related to Figure 1 and Figure 3.** H1299 cells were treated for 48 hrs with DMSO (control) or 1  $\mu$ M alexidine. Proteins were isolated and assessed by mass spectrometry. Proteins with intensities that were at least two-fold higher in control cells than alexidine-treated cells were assessed by Gene Ontology (GO) and PANTHER using the GO Biological Process annotation data set. See all proteins detected in Table S8 (Excel file).

| Table S7: Proteins upregulated in Control vs. Alexidine: GO Cellular Component |                 |                            |
|--------------------------------------------------------------------------------|-----------------|----------------------------|
| Component Name                                                                 | Fold Enrichment | False Discovery Rate (FDR) |
| ribonucleoside-diphosphate reductase complex (GO:0005971)                      | 63.56           | 4.25E-02                   |
| centralspindlin complex (GO:0097149)                                           | 63.56           | 4.16E-02                   |
| condensin complex (GO:0000796)                                                 | 35.75           | 9.16E-03                   |
| outer kinetochore (GO:0000940)                                                 | 20.43           | 2.97E-02                   |
| anaphase-promoting complex (GO:0005680)                                        | 17.33           | 7.99E-03                   |
| mitochondrial small ribosomal subunit (GO:0005763)                             | 11.92           | 2.36E-02                   |
| spindle pole (GO:0000922)                                                      | 5.54            | 1.69E-03                   |
| mitochondrial inner membrane (GO:0005743)                                      | 2.88            | 1.52E-02                   |
| microtubule organizing center (GO:0005815)                                     | 2.24            | 3.65E-02                   |
| nucleoplasm (GO:0005654)                                                       | 1.64            | 1.07E-03                   |

**Table S7. Proteomics analyses of proteins upregulated in Control vs. Alexidine treated cells, related to Figure 1 and Figure 3.** H1299 cells were treated for 48 hrs with DMSO (control) or 1  $\mu$ M alexidine. Proteins were isolated and assessed by mass spectrometry. Proteins with intensities that were at least two-fold higher in control cells than alexidine-treated cells were assessed by Gene Ontology (GO) and PANTHER using the GO Cellular Component annotation data set. See all proteins detected in Table S8 (Excel file).
